# Supplementary material for: A self-directed and reconstructible immobilization strategy: DNA directed immobilization of alkaline phosphatase for enzyme inhibition assays
Source: Royal Society of Chemistry journal article supplement (doi:10.1039/c6ra01621a), 2016-01-01
Supplement: c6ra01621a1.pdf [file c6ra01621a1.pdf]

## **Supporting Information**

### **A self-directed and reconstructible immobilization strategy: DNA directed immobilization of alkaline phosphatase for enzyme inhibition assays**

Ye Yang, Ping Su, Kangle Zheng, Ting Wang, Jiayi Song, Yi Yang\*

*Beijing Key Laboratory of Environmentally Harmful Chemical Analysis, College of Science,*

*Beijing University of Chemical Technology, Beijing 100029, P.R. China.*

**Table S1** DNAs used in this experiment

| Name                 |     | Sequence                                                              |
|----------------------|-----|-----------------------------------------------------------------------|
| Probe DNA            | p12 | 5'-NH <sub>2</sub> -CTTAGCTTCATC-3'                                   |
|                      | p24 | 5'-NH <sub>2</sub> -CTTAGCTTCATCGAGGTCCAGTCA-3'                       |
|                      | p33 | 5'-NH <sub>2</sub> -CTTAGCTTCATCGAGGTCCAGTCAACGTGCGTC-3'              |
|                      | p42 | 5'-NH <sub>2</sub> -CTTAGCTTCATCGAGGTCCAGTCAACGTGCGTCCAG<br>TTCAGG-3' |
| Complementary<br>DNA | c12 | 5'-SH-GATG AAGCTAAG-3'                                                |
|                      | c24 | 5'-SH-TGACTGGACCTCGATGAAGCTAAG-3'                                     |
|                      | c33 | 5'-SH-GACGCACGTTGACTGGACCTCGATGAAGCTAAG-3'                            |
|                      | c42 | 5'-SH-CCTGAACTGGACGCACGTTGACTGGACCTCGAT<br>GAAGCTAAG-3'               |

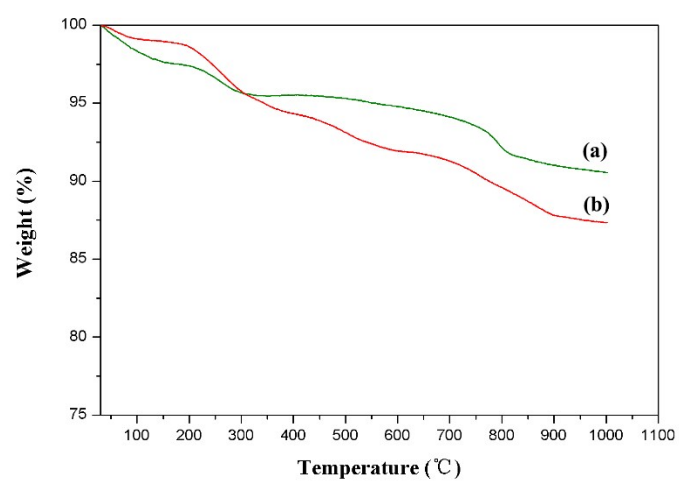

**Fig. S1** TGA curves of (a)  $\text{SiO}_2@\text{Fe}_3\text{O}_4$  and (b) ALP-DNA-MNPs.

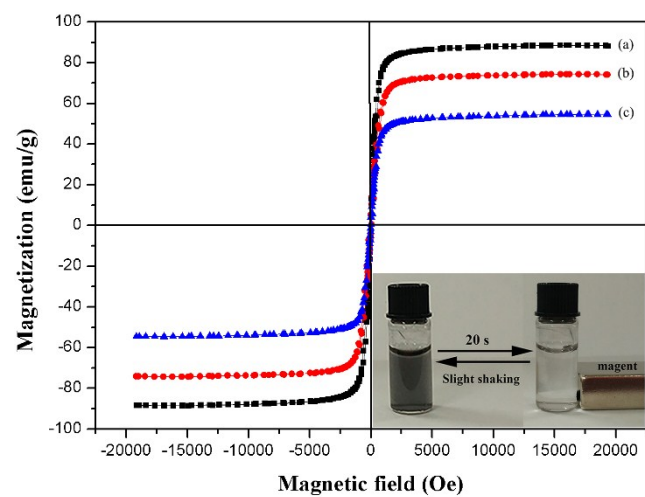

**Fig. S2** Magnetization curves of (a) Fe<sub>3</sub>O<sub>4</sub>, (b) SiO<sub>2</sub>@Fe<sub>3</sub>O<sub>4</sub> and (c) ALP-DNA-MNPs.
